# Supplementary material for: Towards economic processing of high performance garnets – case study on zero Li excess Ga-substituted LLZO
Source: Royal Society of Chemistry journal article supplement (doi:10.1039/d2ta09250f), 2023-01-01
Supplement: d2ta09250f1.pdf [file d2ta09250f1.pdf]

## Towards economic processing of high performance garnets – Case study on zero Li excess Ga-substituted LLZO

Christian Schwab<sup>a</sup>, Grit Häuschen<sup>a</sup>, Markus Mann<sup>a</sup>, Christoph Roitzheim<sup>a</sup>, Olivier Guillon<sup>a,b</sup>, Dina Fattakhova-Rohlfing<sup>a,b</sup> and Martin Finsterbusch<sup>\*a,b</sup>

a) Institute of Energy and Climate Research, Materials Synthesis and Processing (IEK-1), Forschungszentrum Jülich GmbH, Wilhelm-Johnen-Straße, 52425 Jülich, Germany.

a) Helmholtz Institute Münster: Ionics in Energy Storage (IEK-12), Forschungszentrum Jülich GmbH, Corrensstr. 46, 48149 Münster, Germany.

\*) m.fensterbusch@fz-juelich.de

### Supplementary information

#### Extended ICP-OES results

**Table SI1.** Comparison of the ICP-OES results for different dwell times and excess lithium. Stoichiometry in reference to La. Errors on Hf and Al content on the overall stoichiometry are insignificant and therefore not shown.

| Lithium excess | Sample            | Li (mol) | La (mol) | Zr (mol) | Al (mol) | Hf (mol) | Ga (mol) |
|----------------|-------------------|----------|----------|----------|----------|----------|----------|
| 0%             | theoretical value | 6.4      | 3        | 1.98     | 0        | 0.02     | 0.2      |
|                | 1. calcination    | 7.75(21) | 3.00     | 1.86(6)  | < 0.005  | 0.02     | 0.23(1)  |
|                | 2. calcination    | 7.67(36) | 3.00     | 1.88(7)  | < 0.005  | 0.02     | 0.23(2)  |
| 20%            | 1 h               | 7.10(41) | 3.00     | 1.87(12) | < 0.005  | 0.02     | 0.21(1)  |
|                | 5 h               | 7.44(52) | 3.00     | 1.88(13) | 0.01     | 0.02     | 0.22(2)  |
|                | 10 h              | 7.05(22) | 3.00     | 1.89(8)  | 0.01     | 0.02     | 0.19(1)  |
|                | 20 h              | 6.73(28) | 3.00     | 1.90(7)  | 0.01     | 0.02     | 0.14(2)  |
| 10%            | 1. calcination    | 7.09(27) | 3.00     | 1.88(8)  | < 0.005  | 0.02     | 0.23(1)  |
|                | 2. calcination    | 7.08(19) | 3.00     | 1.88(5)  | < 0.005  | 0.02     | 0.24(1)  |
|                | 1 h               | 7.07(51) | 3.00     | 1.83(13) | 0.05     | 0.02     | 0.23(2)  |
|                | 5 h               | 6.80(28) | 3.00     | 1.85(7)  | 0.01     | 0.02     | 0.22(1)  |
|                | 10 h              | 6.67(60) | 3.00     | 1.80(16) | 0.03     | 0.02     | 0.19(2)  |
|                | 20 h              | 6.54(20) | 3.00     | 1.88(6)  | 0.02     | 0.02     | 0.19(1)  |
| 5%             | 1. calcination    | 6.72(48) | 3.00     | 1.87(10) | < 0.005  | 0.02     | 0.22(1)  |
|                | 2. calcination    | 6.72(49) | 3.00     | 1.87(11) | < 0.005  | 0.02     | 0.22(1)  |
|                | 1 h               | 6.72(33) | 3.00     | 1.88(10) | < 0.005  | 0.03     | 0.26(2)  |
|                | 5 h               | 6.67(32) | 3.00     | 1.86(9)  | < 0.005  | 0.02     | 0.23(1)  |
|                | 10 h              | 6.64(33) | 3.00     | 1.85(8)  | 0.04     | 0.02     | 0.24(3)  |
|                | 20 h              | 6.56(36) | 3.00     | 1.85(9)  | 0.04     | 0.02     | 0.23(2)  |
| 0%             | 1. calcination    | 6.51(23) | 3.00     | 1.82(5)  | < 0.005  | 0.02     | 0.22(1)  |
|                | 2. calcination    | 6.42(17) | 3.00     | 1.86(3)  | < 0.005  | 0.02     | 0.22(1)  |
|                | 1 h               | 6.62(40) | 3.00     | 1.87(12) | < 0.005  | 0.02     | 0.23(2)  |
|                | 5 h               | 6.56(31) | 3.00     | 1.86(9)  | < 0.005  | 0.02     | 0.23(2)  |
|                | 10 h              | 6.66(58) | 3.00     | 1.89(17) | 0.03     | 0.03     | 0.25(2)  |
|                | 20 h              | 6.56(62) | 3.00     | 1.87(18) | 0.03     | 0.02     | 0.23(3)  |

# X-ray diffraction patterns of sintered pellets

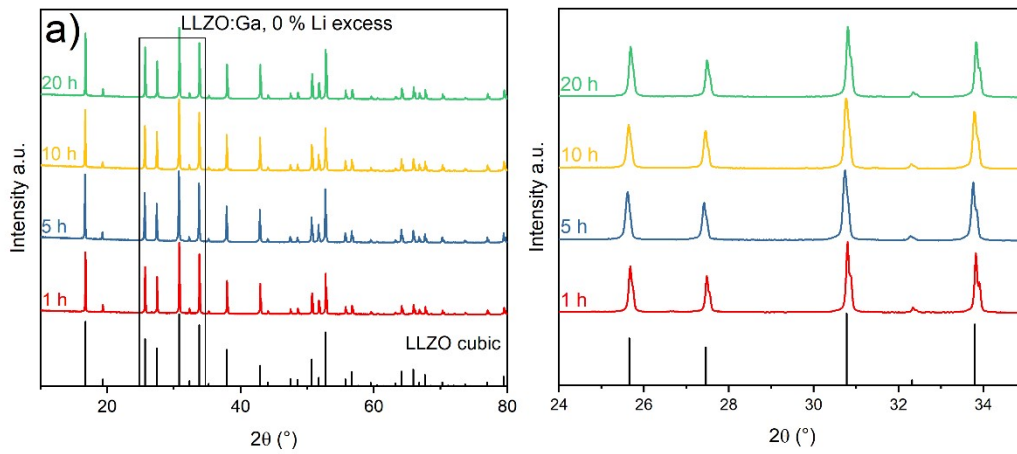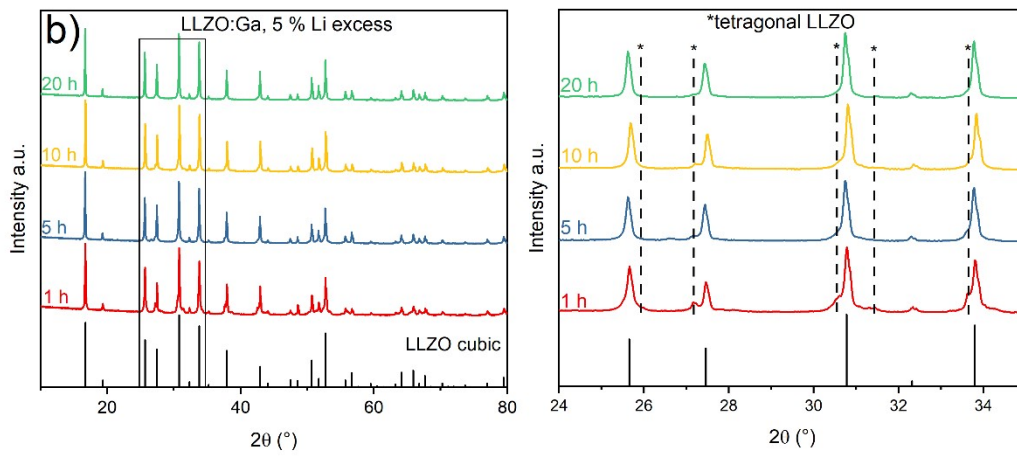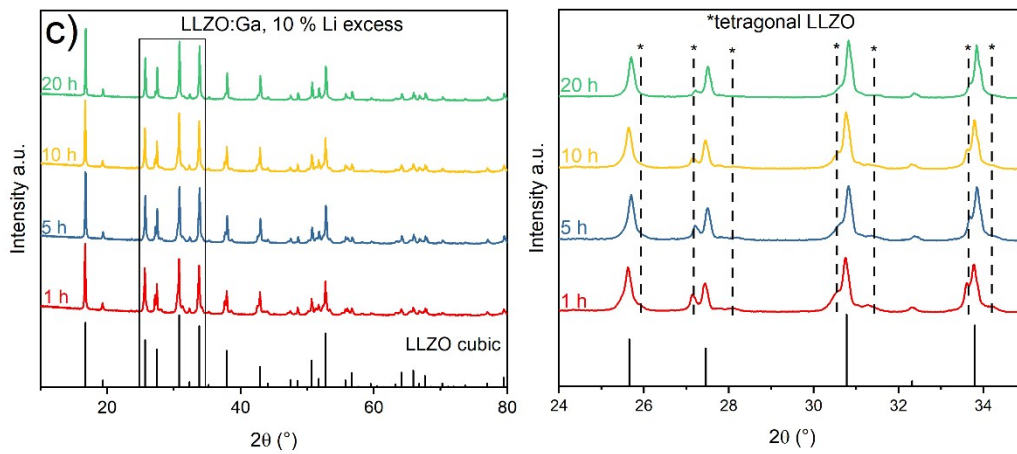

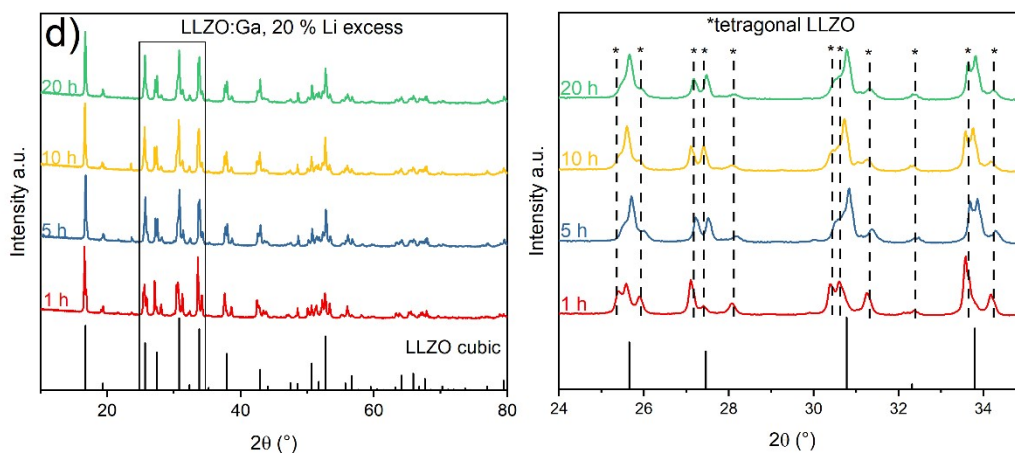

**Figure S11.** XRD patterns of LLZO:Ga with (a) 0% (b) 5% (c) 10% and (d) 20% Lithium excess after different dwell times at 1175 °C.

EIS results and respective fits of 0% Li excess LLZO:Ga sintered at 1175 °C for 5 h in a temperature range of -40 °C to +60 °C.

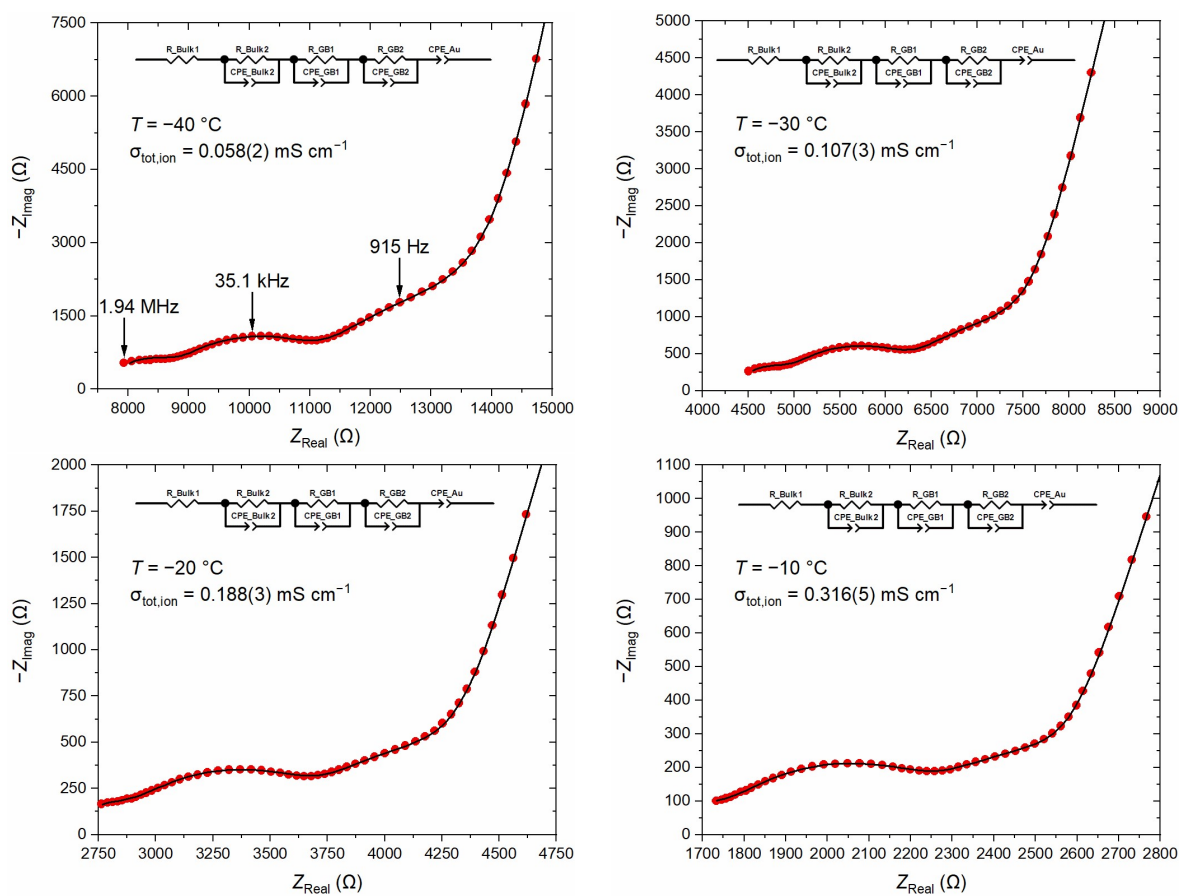

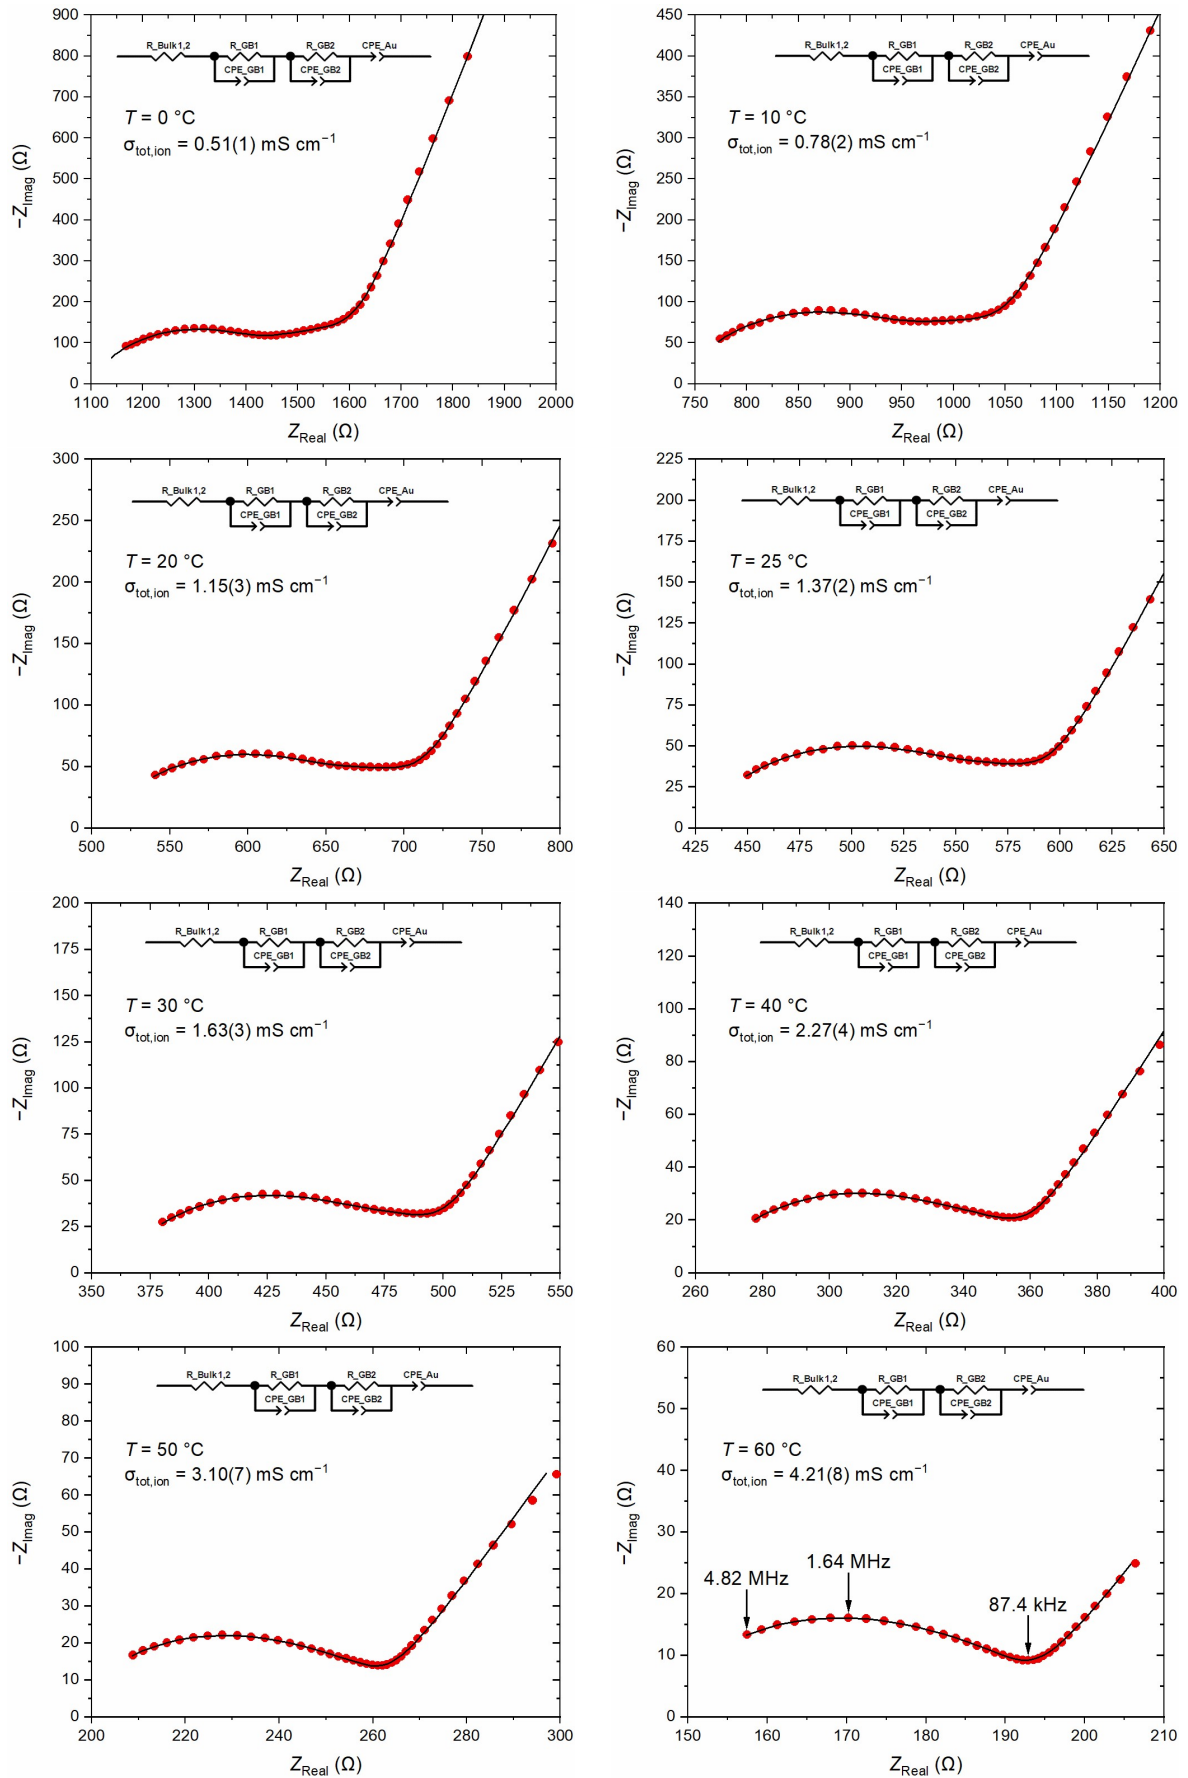

**Figure S12.** EIS fits of 0% Li excess LLZO:Ga sintered at 1175 °C for 5 h in a temperature range from -40 °C to +60 °C.

**Table S12.** EIS fit results of 0% Li excess LLZO:Ga sintered at 1175 °C for 5 h in a temperature range from –40 °C to +60 °C.

| Parameter                                     | –40 °C                   | –30 °C                   | –20 °C                   | –10 °C                  |
|-----------------------------------------------|--------------------------|--------------------------|--------------------------|-------------------------|
| $R_{\text{Bulk1}} (\Omega)$                   | 7635(15)                 | 4316(8)                  | 2617(3)                  | 1621(4)                 |
| $R_{\text{Bulk2}} (\Omega)$                   | 1109(21)                 | 543(12)                  | 247(3)                   | 124(3)                  |
| $C_{\text{Bulk2}} (\text{F})$                 | $1.21(5) \cdot 10^{-10}$ | $1.48(5) \cdot 10^{-10}$ | $1.94(5) \cdot 10^{-10}$ | $1.3(7) \cdot 10^{-10}$ |
| $R_{\text{GB1}} (\Omega)$                     | 2475(86)                 | 1447(43)                 | 890(11)                  | 556(7)                  |
| $C_{\text{GB}} (\text{F})$                    | $1.8(8) \cdot 10^{-9}$   | $1.8(7) \cdot 10^{-9}$   | $1.7(3) \cdot 10^{-9}$   | $1.6(3) \cdot 10^{-9}$  |
| $R_{\text{GB2}} (\Omega)$                     | 2728(167)                | 1168(54)                 | 513(12)                  | 248(7)                  |
| $C_{\text{GB2}} (\text{F})$                   | $7.6(35) \cdot 10^{-8}$  | $8.0(31) \cdot 10^{-8}$  | $8.9(17) \cdot 10^{-8}$  | $9.4(21) \cdot 10^{-8}$ |
| $\sigma_{\text{tot,ion}} (\text{mS cm}^{-1})$ | 0.058(2)                 | 0.107(3)                 | 0.188(3)                 | 0.316(5)                |

| Parameter                                     | 0 °C                   | 10 °C                   | 20 °C                   | 25 °C                   | 30 °C                   | 40 °C                   | 50 °C                   | 60 °C                   |
|-----------------------------------------------|------------------------|-------------------------|-------------------------|-------------------------|-------------------------|-------------------------|-------------------------|-------------------------|
| $R_{\text{Bulk1,2}}$                          | 1098(3)                | 735(3)                  | 506.8(17)               | 426.5(7)                | 360.2(7)                | 262.0(5)                | 195.1(5)                | 146.0(3)                |
| $R_{\text{GB1}} (\Omega)$                     | 360(8)                 | 236(7)                  | 158(5)                  | 135(3)                  | 113(3)                  | 81(2)                   | 55(2)                   | 38.8(12)                |
| $C_{\text{GB}} (\text{F})$                    | $1.4(6) \cdot 10^{-9}$ | $1.4(9) \cdot 10^{-9}$  | $1.5(9) \cdot 10^{-9}$  | $1.5(5) \cdot 10^{-9}$  | $1.5(6) \cdot 10^{-9}$  | $1.6(6) \cdot 10^{-9}$  | $1.7(9) \cdot 10^{-9}$  | $1.8(7) \cdot 10^{-9}$  |
| $R_{\text{GB2}} (\Omega)$                     | 131(5)                 | 66(5)                   | 37(3)                   | 27.5(16)                | 21.3(17)                | 12.1(14)                | 9.2(16)                 | 6.6(8)                  |
| $C_{\text{GB2}} (\text{F})$                   | $8.1(7) \cdot 10^{-8}$ | $8.3(10) \cdot 10^{-8}$ | $8.4(12) \cdot 10^{-8}$ | $9.4(11) \cdot 10^{-8}$ | $8.7(17) \cdot 10^{-8}$ | $8.7(17) \cdot 10^{-8}$ | $6.1(16) \cdot 10^{-8}$ | $5.8(11) \cdot 10^{-8}$ |
| $\sigma_{\text{tot,ion}} (\text{mS cm}^{-1})$ | 0.51(1)                | 0.78(2)                 | 1.15(3)                 | 1.37(2)                 | 1.63(3)                 | 2.27(4)                 | 3.10(7)                 | 4.21(8)                 |
